# Supplementary material
Source: PubMed Central journal article supplement (PMC6640855)
Supplement: NIHMS1521092-supplement-2.pdf [file NIHMS1521092-supplement-2.pdf]

| Protein                    | RNA_targeted            | Sequence                                            |
|----------------------------|-------------------------|-----------------------------------------------------|
| IGF2BP3_88A                | SPRED2_A                | CGAGGCACCAUCCAGCCAGGGACGCUGCCGGGUA                  |
| IGF2BP3_88m <sup>6</sup> A | SPRED2_m <sup>6</sup> A | CGAGGCACCAUCCAGCCAGGGm <sup>6</sup> ACGCUGCCGGGUA   |
| IGF2BP3_88U                | SPRED2_U                | CGAGGCACCAUCCAGCCAGGGUCGCUGCCGGGUA                  |
| IGF2BP3_94A                | SERBP1_A                | CACCUAAAGACUGAAUUUUUAUCUGUUUUAAAAAUG                |
| IGF2BP3_94m <sup>6</sup> A | SERBP1_m <sup>6</sup> A | CACCUAAAGm <sup>6</sup> ACUGAAUUUUUAUCUGUUUUAAAAAUG |
| IGF2BP3_94U                | SERBP1_U                | CACCUAAAGUCUGAAUUUUUAUCUGUUUUAAAAAUG                |
| LIN28A_53A                 | NUP153_A                | UUUGUUUUUGGGAAGGACAGAAGAGAAACAG                     |
| LIN28A_53m <sup>6</sup> A  | NUP153_m <sup>6</sup> A | UUUGUUUUUGGGAAGGm <sup>6</sup> ACAGAAGAGAAACAG      |
| LIN28A_53U                 | NUP153_U                | UUUGUUUUUGGGAAGGUCAGAAGAGAAACAG                     |
| LIN28A_77A                 | HOXB9_A                 | GACAAGUGGUCUGGGACAGGGAGGAGCAAC                      |
| LIN28A_77m <sup>6</sup> A  | HOXB9_m <sup>6</sup> A  | GACAAGUGGUCUGGGm <sup>6</sup> ACAGGGAGGAGCAAC       |
| LIN28A_77U                 | HOXB9_U                 | GACAAGUGGUCUGGGUCAGGGAGGAGCAAC                      |
