# Supplementary material
Source: PubMed Central journal article supplement (PMC6640855)

# IGF2BP3

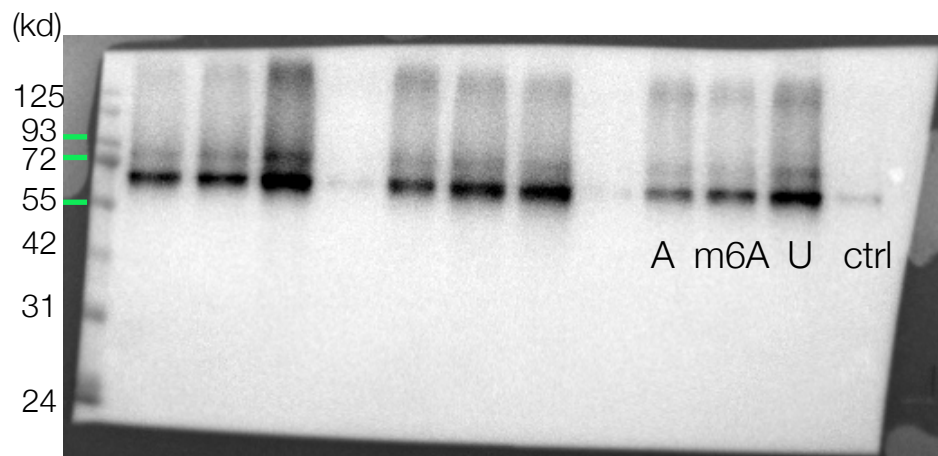

# IGF2BP3 input(GAPDH)

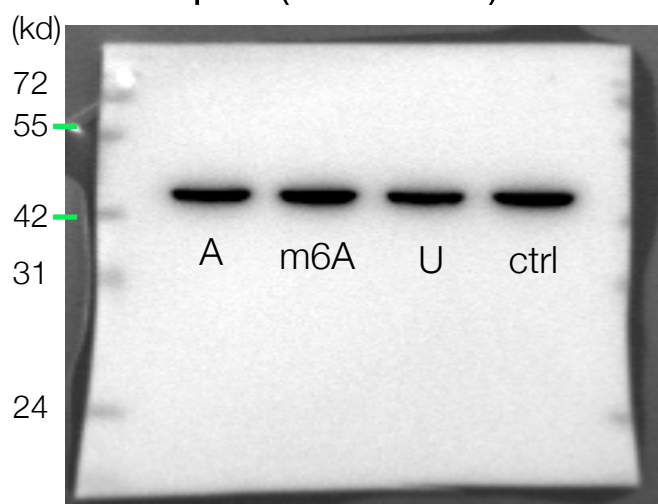

# LIN28A

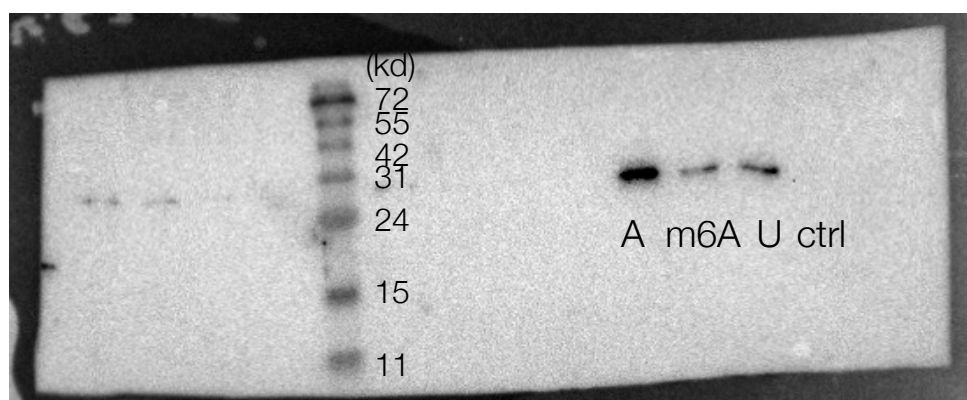

# LIN28A input(GAPDH)

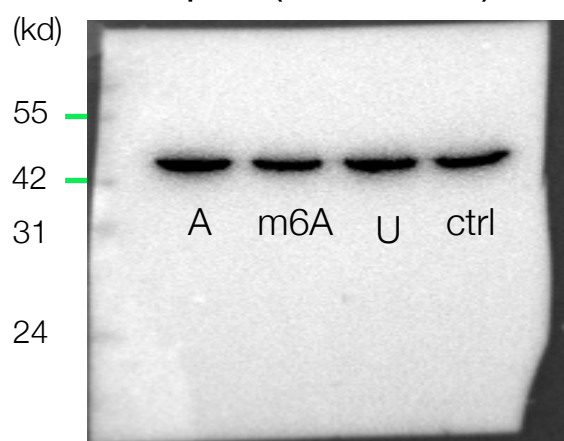

Supplement: NIHMS1521092-supplement-Sup_dataset.pdf [file NIHMS1521092-supplement-Sup_dataset.pdf]
